# Supplementary material for: Eco-Inefficiency Formula: A Method to Verify the Cost of the Economic, Environmental, and Social Impact of Waste in Food Services
Source: MDPI journal article supplement (doi:10.3390/foods10061369), 2021-06-13
Supplement: s1 [file s1]

Table S1. Week menu per day of each school analyzes in the study of eco-inefficiency formula

| School Code | WEEK MENU                              |                                                                  |                                        |                                                     |                                                                                              |
|-------------|----------------------------------------|------------------------------------------------------------------|----------------------------------------|-----------------------------------------------------|----------------------------------------------------------------------------------------------|
|             | Monday                                 | Tuesday                                                          | Wednesday                              | Thursday                                            | Friday                                                                                       |
| 1           | Rice with pork                         | Noodle soup with chicken, pumpkin, and tomato                    | Chicken, crumbs with cabbage and apple | Bread with chicken breast and pineapple juice       | Mapará (fish) fillet with potatoes, green peppers and rice and grated beet salad with tomato |
| 2           | Rice with beans and pork palette       | Fish with mush, white rice, and cucumber with carrot salad       | Pasta with chicken and melon           | Chicken with cucumber and carrot salad              | Shortbread with banana smoothie                                                              |
| 3           | Rice with beans and pork palette       | Fish with flour and own sauce, white rice, and tangerine         | Shortbread and dairy compound          | Pasta with chicken breast                           | Chicken with boiled sweet potatoes                                                           |
| 4           | Cornstarch biscuit with dairy compound | Pork palette with carrot, rice, beet with broccoli and tangerine | Bread with chicken and pineapple juice | Noodle soup with pork and carrots, cabbage and kale | Banana smoothie with cornstarch biscuit                                                      |

Table S2. Model of Technical Preparation Files Form

|                                     |                               |                      |                 |                      |
|-------------------------------------|-------------------------------|----------------------|-----------------|----------------------|
| Technical Preparation Files         |                               |                      |                 |                      |
| Restaurant Identification:<br>_____ |                               | Date: ____/____/____ |                 | Researcher:<br>_____ |
| Preparation:                        |                               | Number of diners:    |                 |                      |
| Yield:<br>Kg                        | Production<br>leftover:<br>Kg | Rest-intake:<br>Kg   | Portion:<br>(g) | Homemade measure:    |
| Ingredients                         |                               | GW (g)               |                 | NW (g)               |
|                                     |                               |                      |                 |                      |
|                                     |                               |                      |                 |                      |
|                                     |                               |                      |                 |                      |
|                                     |                               |                      |                 |                      |
|                                     |                               |                      |                 |                      |
|                                     |                               |                      |                 |                      |
|                                     |                               |                      |                 |                      |
|                                     |                               |                      |                 |                      |
| PREPARATION MODE                    |                               |                      |                 |                      |
|                                     |                               |                      |                 |                      |

Table S3. “Wasted food/Meal produced” by day of each school analyzed in the pilot study of eco-inefficiency formula

|        |   | Day  |      |      |      |      |
|--------|---|------|------|------|------|------|
|        |   | 1    | 2    | 3    | 4    | 5    |
| School | 1 | 0.38 | 0.54 | 0.37 | 0.53 | 0.52 |
|        | 2 | 0.68 | 0.44 | 0.55 | 0.34 | 0.56 |
|        | 3 | 0.43 | 0.36 | 0.30 | 0.15 | 0.43 |
|        | 4 | 0.20 | 0.38 | 0.44 | 0.51 | 0.42 |

Table S4. Average of the values of each variable collected and their respective classification according to the Severity Factor (SF) for schools analyzed in the pilot study of eco-inefficiency formula

| Dimension | ITEM              | School 1       |    | School 2       |    | School 3       |    | School 4       |    |
|-----------|-------------------|----------------|----|----------------|----|----------------|----|----------------|----|
|           |                   | Data collected | SF |
| Economic  | Raw Material Cost | 46.77          | 3  | 51.28          | 3  | 33.11          | 3  | 39.21          | 3  |
|           | Electricity       | 0.39           | 3  | 0.39           | 3  | 0.29           | 3  | 0.84           | 3  |
|           | LPG <sup>1</sup>  | 0.60           | 1  | 0.60           | 1  | 0.60           | 1  | 0.60           | 1  |
|           | Handler's salary  | 16.15          | 1  | 17.7           | 1  | 11.45          | 1  | 13.55          | 1  |
| Ambiental | Water Footprint   | 12954.93       | 2  | 32027.04       | 2  | 14502.11       | 2  | 9491.31        | 1  |
|           | Cleaning Material | Incorrect      | 3  | Incorrect      | 3  | Incorrect      | 3  | Incorrect      | 3  |
|           | Food shavings     | 8.40           | 2  | 18.23          | 3  | 3.48           | 2  | 15.50          | 3  |
|           | %RI <sup>2</sup>  | 20.71          | 3  | 33.95          | 3  | 14.00          | 3  | 7.72           | 2  |
|           | %DL <sup>3</sup>  | 18.37          | 3  | 10.80          | 3  | 15.89          | 3  | 14.51          | 3  |
| Social    | ED RI             | 0.78           | 1  | 0.85           | 1  | 0.94           | 1  | 0.96           | 1  |
|           | ED DL             | 0.78           | 1  | 1.34           | 1  | 1.49           | 1  | 1.52           | 1  |
|           | Organic food      | 0              | 3  | 0              | 3  | 0              | 3  | 0              | 3  |
|           | Food destination  | -              | 3  | -              | 3  | -              | 3  | -              | 3  |

<sup>1</sup> Liquefied petroleum gas

<sup>2</sup> Rest-intake

<sup>3</sup> Distribution leftover
